# Supplementary material for: LAPONITE® nanoplatform functionalized with histidine modified oligomeric hyaluronic acid as an effective vehicle for the anticancer drug methotrexate
Source: Royal Society of Chemistry journal article supplement (doi:10.1039/c8tb01284a), 2018-01-01
Supplement: c8tb01284a1.pdf [file c8tb01284a1.pdf]

## Supporting Information

Laponite nanoplatform functionalized with histidine modified oligomeric hyaluronic acid as an effective vehicle for anticancer drug methotrexate

Jinyu Li<sup>1</sup>, Yue Yang<sup>1</sup>, Yibin Yu, Qi Li<sup>1</sup>, Guoxin Tan<sup>1</sup>, Yuanyuan Wang<sup>1</sup>, Wei Liu<sup>1,2</sup>, Weisan Pan<sup>1,\*</sup>

<sup>1</sup>School of Pharmacy, Shenyang Pharmaceutical University, Shenyang 110016, People's Republic of China

<sup>2</sup>Henan Key Laboratory of Laser and Opto-electric Information Technology, School of Information Engineering, Zhengzhou University, Henan 450052, China

\*Correspondence: Weisan Pan

Department of Pharmaceutics, School of Pharmacy, Shenyang Pharmaceutical University, 103 Wenhua road, Shenyang, 110016, People's republic of China

Tel +86 24 4352 0533      Fax +86 24 2395 3241

Email: pppwwwsss@163.com

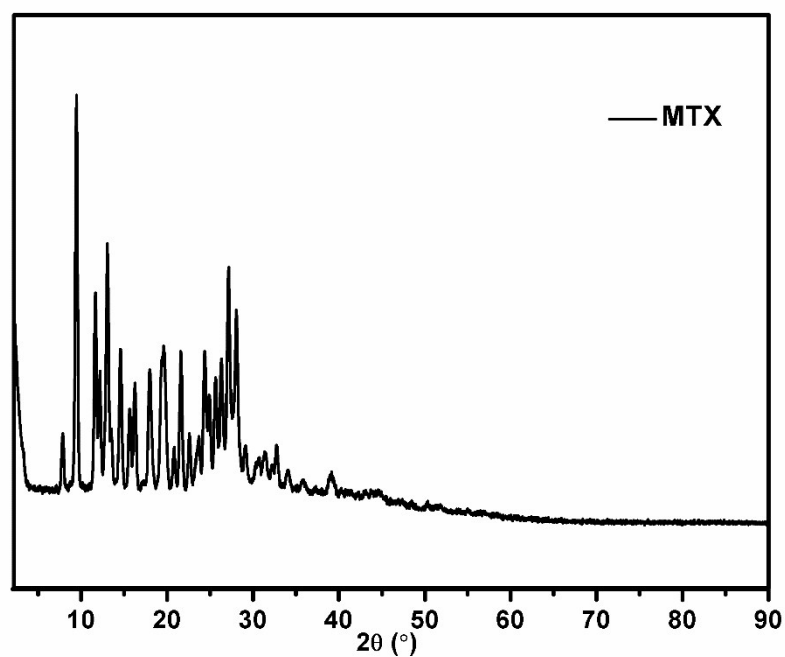

Figure. S1 XRD of pure MTX

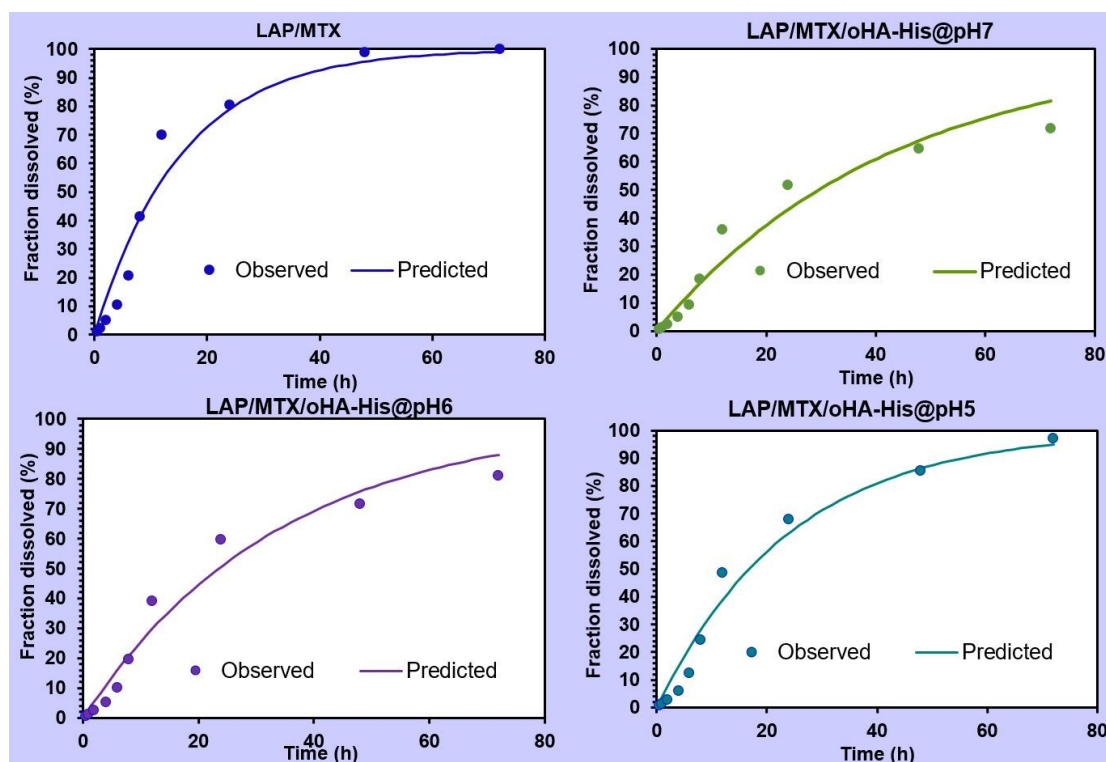

Figure.S2 First-order model for the release of MTX from LAP/MTX and LAP/MTX/oHA-His in different pH.
